# Supplementary material for: Imputation of Missing PM2.5 Observations in a Network of Air Quality Monitoring Stations by a New kNN Method
Source: MDPI journal article supplement (doi:10.3390/atmos13111934), 2022-11-21
Supplement: s1 [file s1]

Imputation of missing PM<sub>2.5</sub> observations in an air-quality monitoring network of air quality monitoring stations by a new kNN method

Formatted: Font: Italic, Complex Script Font: Italic

Supplementary Material

Idit Belachsen and David M. Broday\*

Faculty of Civil and Environmental Engineering, Technion, Israel Institute of Technology, Haifa,  
Israel

Corresponding author:

David Broday, Faculty of Civil and Environmental Engineering, Technion, Israel  
E-mail: [dbroday@technion.ac.il](mailto:dbroday@technion.ac.il)

**Table S1.** The ID numbers and names of the 59 AQM stations in the imputed dataset. In bold are the 36 AQM stations that have accumulated missing observations of ≤4 years.

| AQM station ID and name   |                          |                           |                            |
|---------------------------|--------------------------|---------------------------|----------------------------|
| 1: <b>Afula</b>           | 2: <b>Antokolsky</b>     | 3: Ehad-Haam              | 4: <b>Holon</b>            |
| 5: <b>Ironi D</b>         | 6: <b>Kvish 4</b>        | 7: <b>Petah-Tikva rd.</b> | 8: Rakevet Hagana          |
| 9: Rakevet Hashalom       | 10: Rakevet Komemyut     | 11: Rakevet Yoseftal      | 12: <b>Remez</b>           |
| 13: Rishon-Lezion         | 14: Tahana Merkazit      | 15: <b>Yad Lebanim</b>    | 16: <b>Yefet Yafo</b>      |
| 17: <b>Ahuza G</b>        | 18: <b>Atzmaut B</b>     | 19: Begin                 | 20: Igud                   |
| 21: Kakal                 | 22: <b>Kiryat Ata</b>    | 23: <b>Kiryat Bialik</b>  | 24: <b>Kiryat Binyamin</b> |
| 25 : <b>Kiryat Tivon</b>  | 26: <b>Nave-Shaanan</b>  | 27: <b>Nesher</b>         | 28: Park Hacarmel          |
| 29: <b>Bar-Ilan</b>       | 30: <b>Efrata</b>        | 31: Nave-Ilan             | 32: <b>Ashdod Igud</b>     |
| 33: <b>Ashkelon South</b> | 34: <b>Dalya</b>         | 35: <b>Gedera</b>         | 36: <b>Gvaraam</b>         |
| 37: Hayovel               | 38: <b>Kiryat Malahi</b> | 39: <b>Nir-Israel</b>     | 40: Ofek                   |
| 41: <b>Ort</b>            | 42: <b>Rova TV</b>       | 43: <b>Sderot</b>         | 44: <b>Sde-Yoav</b>        |
| 45: <b>Yahalom</b>        | 46: <b>Beer-Sheva</b>    | 47: <b>East Negev</b>     | 48: <b>Kfar-Masarik</b>    |
| 49: Barkai                | 50: Hefziba              | 51: Kfar-Saba             | 52: <b>Pardes-Hana</b>     |
| 53: <b>Raanana</b>        | 54: Shfeya               | 55: Bnei-Atarot           | 56: Modein                 |
| 57: Ashalim               | 58: Gush-Ezion           | 59: Neot-Hakikar          |                            |

**Table S2.** The performance metrics used in this work, with  $y_i$  the true measured value and  $\hat{y}_i$  the imputed value.

| Abbreviation            | Term                                        | Formula                                                                                                                                                             |
|-------------------------|---------------------------------------------|---------------------------------------------------------------------------------------------------------------------------------------------------------------------|
| <i>NRMSE</i>            | Normalized root mean squared error          | $\frac{\sqrt{\frac{1}{N} \sum_{i=1}^N (y_i - \hat{y}_i)^2}}{\frac{1}{N} \sum_{i=1}^N y_i} = \frac{RMSE}{mean(Y)}$                                                   |
| $R^2$                   | Coefficient of determination                | $1 - \frac{\sum_{i=1}^N (y_i - \hat{y}_i)^2}{\sum_{i=1}^N (y_i - \bar{y})^2}$                                                                                       |
| <i>NMAE</i>             | Normalized mean absolute error              | $\frac{\sum_{i=1}^N  y_i - \hat{y}_i }{\frac{1}{N} \sum_{i=1}^N y_i} = \frac{MAE}{mean(Y)}$                                                                         |
| <i>NMB</i>              | Normalized mean bias                        | $\frac{\sum_{i=1}^N (y_i - \hat{y}_i)}{\frac{1}{N} \sum_{i=1}^N y_i} = \frac{MB}{mean(Y)}$                                                                          |
| <i>Normalized CRMSE</i> | Normalized centered root mean squared error | $\frac{\sqrt{\frac{1}{N} \sum_{i=1}^N [(y_i - \bar{y}) - (\hat{y}_i - \bar{\hat{y}})]^2}}{\sqrt{\frac{1}{N} \sum_{i=1}^N (y_i - \bar{y})^2}} = \frac{CRMSE}{SD(Y)}$ |

**Table S3.** The tuned hyperparameters of the *wkNNr* model (see section 2.4.1). *k*- the number of weights accounted for, *q*- the power in Eq. 4.

| Hyperparameter  | <i>k</i> | <i>q</i> | Correlation type |
|-----------------|----------|----------|------------------|
| Search space    | 5-100    | 1-2.5    | Spearman/Pearson |
| Optimal values: |          |          |                  |
| very short      | 10       | 2.5      | Spearman         |
| short           | 25       | 2        | Spearman         |
| medium-length   | 30       | 1.5      | Spearman         |
| long            | 35       | 1.5      | Spearman         |

**Table S4.** The tuned hyperparameters of the *iiET* model (see section 2.4.2). *n\_estimators*- the number of trees in the ensemble, *min\_samples\_leaf*- the minimum number of samples in each leaf node, *min\_samples\_split*- the minimum number of samples required to split a node, and *max\_iter*- the number of iterations.

| Hyperparameter | <i>n_estimators</i> | <i>min_samples_split</i> | <i>min_samples_leaf</i> | <i>max_iter</i> |
|----------------|---------------------|--------------------------|-------------------------|-----------------|
| Search space   | 40-100              | 2-10                     | 1-10                    | 1-10            |
| Optimal value: |                     |                          |                         |                 |
| very short     | 70                  | 4                        | 1                       | 2               |
| short          | 80                  | 5                        | 3                       | 2               |
| medium-length  | 80                  | 4                        | 2                       | 2               |
| long           | 100                 | 9                        | 2                       | 2               |
